# Supplementary material for: Dietary Fructose Suppresses Hepatocellular Carcinogenesis through Fructose 1-Phosphate-Mediated Inhibition of Mannose Phosphate Isomerase
Source: Research Square preprint supplement (doi:10.21203/rs.3.rs-6049102/v1), 2025-04-09
Supplement: Supplementary file 1 [file 3316790036eda6384bc5f94b.xlsx]

## Sheet: Extended Data table. 1
Clinical information from 8 paired HCC tumor tissues and adjacent normal tissues were used for metabolic flux analysis and single-cell sequencing as shown in Fig. 1
Patient ID	Male	Age (y)	HBV infection	Liver cirrhosis	AFP (ng/ml) >400	ALT (U/L) >32	AST (U/L) >30.5	Total Bilirubin (μmol/L) >11.6	Albumin (g/L) >41.45	PT (s) >11.55	Tumor Size (cm)	No. tumor	Tumor capsule	Micro-vascular invasion	Differentiation (III)	Recurrence	Overall survival
1	F	53	1	0	1	1	1	1	1	1	16	Solitary	1	1	0	1	0
2	M	42	1	0	1	0	1	1	1	0	13	Solitary	1	1	1	0	0
3	M	60	1	1	0	1	1	1	0	1	5.5	Multiple	0	1	1	1	1
4	M	49	1	1	0	0	0	1	0	1	6.5	Solitary	0	1	0	1	1
5	F	71	0	0	0	1	1	0	0	0	8	Solitary	1	0	1	0	0
6	M	41	1	0	0	1	0	0	0	0	5.5	Solitary	1	0	0	0	0
7	M	62	1	0	0	1	0	0	1	0	5.5	Solitary	0	0	0	0	0
8	M	51	1	1	0	0	1	1	0	0	12	Solitary	0	1	0	0	0

## Sheet: Extended Data table. 2
Clinical characters of HCC patients according to ALDOB expression
	ALDOB (n=183)
Variable	Low expression (91)	High expression (91)	p-value
Background
male	82（90.1%)	85(93.4%)
Age (y)	48.49（±9.23）	49.22（±9.77）
HBsAg (positive)	85 (92.4%)	86 (94.5%)
HBeAg (positive)	25 (27.5%)	29 (31.9%)
Anti-HBcAg (positive)	89 (97.8%)	90 (98.9%)
Liver cirrhosis	81 (89.0%)	87 (95.6%)
AFP (ng/ml) >400	39 (42.9%)	32 (35.2%)
Liver Function
ALT (U/L) >32	58 (63.7%)	58 (63.7%)
AST (U/L) >30.5	59 (64.8%)	60 (65.9%)
Total Bilirubin (μmol/L) >11.6	59 (64.8%)	58 (63.7%)
Albumin (g/L) >41.45	48 (52.7%)	52 (57.1%)
PT (s) >11.55	78 (58.7%)	64 (70.3%)
Tumor Factors
Tumor Size (cm)	6.72 (1, 19)	6.34 (1.3, 16)
No. tumor
Solitary	81 (89.0%)	81 (89.0%)
Multiple	10 (11.0%)	10 (11.0%)
Pathologic factors
Tumor capsule	54 (59.3%)	55 (60.4%)
Micro-vascular invasion	40 (44.0%)	37 (40.7%)
Differentiation (III)	67 (73.6%)	68 (74.7%)
Recurrence	65 (71.4%)	49 (53.8%)
Overall survival	62 (68.1%)	58 (63.7%)

## Sheet: Extended Data table. 3
Clinical characters of HCC patients according to KHK expression
	KHK (n=182)
Variable	Low expression (91)	High expression (91)	p-value
Background
male	82 (90.1%)	85 (93.4%)
Age (y)	48.73（±9.42）	48.99（±9.60）
HBsAg (positive)	82 (90.1%)	88 (96.7%)
HBeAg (positive)	23 (25.3%)	31 (34.1%)
Anti-HBcAg (positive)	88 (96.7%)	91 (100.0%)
Liver cirrhosis	81 (89.0%)	87 (95.6%)
AFP (ng/ml) >400	37 (40.7%)	34 (37.4%)
Liver Function
ALT (U/L) >32	56 (61.5%)	60 (65.9%)
AST (U/L) >30.5	56 (61.5%)	63 (69.2%)
Total Bilirubin (μmol/L) >11.6	57 (62.6%)	60 (65.9%)
Albumin (g/L) >41.45	49 (53.8%)	51 (56.0%)
PT (s) >11.55	70 (76.9%)	72 (79.1%)
Tumor Factors
Tumor Size (cm)	6.86 (1, 19)	6.20 (1.3, 15)
No. tumor
Solitary	83 (91.2%)	85 (93.4%)
Multiple	8 (8.8%)	6 (6.6%)
Pathologic factors
Tumor capsule	51 (56.0%)	60 (65.9%)
Micro-vascular invasion	49 (53.8%)	35 (38.5%)
Differentiation (III)	65 (71.4%)	70 (76.9%)
Recurrence	66 (72.5%)	63 (69.2%)
Overall survival	59 (64.8%)	54 (59.3%)

## Sheet: Extended Data table. 4 
Candidate Peptides and Proteins for F1P interaction identified from LIP-SMap Analysis, Related to Figure
	LFQ.intensity:control			LFQ.intensity:low			LFQ.intensity:high						low		high
	con-1	con-2	con-3	low-1	low-2	low-3	high-1	high-2	high-3	Sequence	Proteins	Gene	log2FC（low/control）	P.Value（low/control）	log2FC(high/control)	P.Value(high/control)
1	1	1	1	263770000	184860000	260790000	730430000	731230000	732167000	GILAADESVGTMGNR	P05062	ALDOB	27.8171	0.00585691	29.4458	2.35573e-07
2	1	1	1	209100000	240170000	237260000	233880000	195460000	171047000	QRGGNASNSCTVL	P50053	KHK	27.7698	0.000934521	27.5764	0.00412364
3	1	1	1	137380000	139730000	159500000	139180000	131610000	116446700	AVLSLYASGR	P60709	ACTB	27.1168	0.00115748	26.9437	0.00133512
4	1	1	1	121520000	98014000	121740000	83431000	81419000	81159000	NVGSHCDLSLK	P21333	FLNA	26.7614	0.00237738	26.2892	3.83204e-05
5	1	1	1	57335000	76636000	71674000	169470000	110140000	113553200	AIFAGYKR	P18077	RPL35A	26.0306	0.0035256	26.9656	0.0104328
6	1	1	1	45503000	78680000	74523000	47113000	46170000	10246000	EVFEDAAEIR	P19338	NCL	25.9811	0.0119673	25.0405	0.0523022
7	1	1	1	40981000	57541000	89740000	316390000	321110000	303160000	GGSSEPCALCSLHSIGK	P14174	MIF	25.9032	0.0241479	28.2241	0.000146717
8	1	1	1	65382000	62779000	46115000	42963000	42748000	40390000	SISGDPEIDKK	Q9BY44	EIF2A	25.7918	0.00531123	25.325	0.000192116
9	1	1	1	57552000	44667000	52087000	53149000	36471000	30594000	KRLEEPEEPK	O75822	EIF3J	25.6163	0.0026142	25.2561	0.0136316
10	1	1	1	46647000	50565000	54522000	111680000	116580000	119342000	GDCVECMACSDNTVRAGLTPK	P34949	MPI	25.592	0.00100706	26.7879	0.000186825
11	1	1	1	38141000	55200000	56412000	93914000	96193000	48250000	GLNLVASGGTAK	P31939	ATIC	25.573	0.00683903	26.2436	0.0182612
12	1	1	1	70032000	37422000	37106000	2041300	2243300	1432200	TLTGTVIDSGDGVTHVIPVAEGY	P61158	ACTR3	25.5221	0.0238677	20.8618	0.00798708
13	1	1	1	42049000	47903000	41549000	33420000	30696000	31632000	TTVGVDGSLYK	P19367	HK1	25.3855	0.00107923	24.9278	0.000313122
14	1	1	1	31353000	48688000	38350000	73541000	60297000	74089000	TFDQLTPEESKER	O43852	CALU	25.234	0.00794578	26.0465	0.00210263
15	1	1	1	41963000	38267000	29521000	117190000	115160000	10810000	TGQAAELGGLLK	O00231	PSMD11	25.1247	0.00500782	26.2724	0.0736961
16	1	1	1	37071000	37348000	33835000	64089000	51601000	4319400	ILVTGGSGLVGK	Q13630	GFUS	25.1049	0.00048759	25.2536	0.0795342
17	1	1	1	30634000	25116000	26212000	25966000	29568000	14726000	AFVLNPAIGPEGLSGSSR	Q14397	GCKR	24.7035	0.0018947	24.4812	0.0172731
18	1	1	1	26447000	28884000	24572000	17251000	14066000	5696000	SAPSIPKENFSCLTR	P40925	MDH1	24.6668	0.00109468	23.5566	0.0349599
19	1	1	1	32369000	29678000	16058000	20280000	18497000	14120000	TSEVPYAGINIGPVHKK	O60841	EIF5B	24.6339	0.0178037	24.0717	0.00530057
20	1	1	1	24894000	20055000	26100000	21650000	21120000	29506000	IVAVTGAEAQK	P49588	AARS1	24.4973	0.00301397	24.5221	0.00621483
21	1	1	1	24996000	27724000	16306000	18312000	15452000	6431900	VKELQAEQEDR	Q00341	HDLBP	24.4557	0.0108311	23.6756	0.0322755
22	1	1	1	15603000	32134000	16361000	21369000	11405000	20116000	EALGDAQQSVR	Q99615	DNAJC7	24.3488	0.0290572	24.0715	0.0150836
23	1	1	1	17851000	22013000	24032000	91856000	58333000	57756600	VFQVEYAMK	P25788	PSMA3	24.3443	0.00361027	26.0467	0.0127193
24	1	1	1	19504000	20256000	22027000	37509000	38418000	13485000	LAGVTLGQR	P26358	DNMT1	24.2958	0.000657974	24.829	0.0337592
25	1	1	1	22329000	15565000	22383000	30042000	26106000	8744800	TREEECHFYAGGQ	Q13162	PRDX4	24.2601	0.00622846	24.3666	0.0402896
26	1	1	1	23187000	16163000	20281000	137620000	120620000	98069000	AGGEAGVTLGQPHLSR	P41091	EIF2S3	24.2446	0.00517326	26.8236	0.00458698
27	1	1	1	25755000	17515000	16263000	2503800	2403800	2347100	SSQEVVDFIQSK	O15355	PPM1G	24.2422	0.010889	21.2055	0.000179313
28	1	1	1	18093000	18910000	20906000	46760000	32758000	44944690	TLGDFAAEYAK	P09874	PARP1	24.2023	0.000934058	25.3062	0.00552121
29	1	1	1	17109000	20942000	19487000	100530000	80636000	93836700	YAGKDGYNYTLSK	P31949	S100A11	24.193	0.00168776	26.4499	0.00202015
30	1	1	1	18958000	13295000	20892000	33680000	39477000	39439900	AGEARPGPTAESA	Q13501	SQSTM1	24.0785	0.0080782	25.1616	0.00131172
31	1	1	1	15270000	15964600	17226000	21211980	19121000	18197000	SLADELALVDVLEDKLK	P07195	LDHB	23.9453	0.000626849	24.2177	0.00104147
32	1	1	1	8802000	10615000	17557000	135990000	117500000	131200000	SGETEDTFIADLVVGLCTGQIK	P06733	ENO1	23.555	0.021903	26.9342	0.000930781
33	1	1	1	9799300	11456000	10251000	23421000	16874000	14057600	EALTYDGALLGDR	Q15056	EIF4H	23.3242	0.00110466	24.1109	0.0113215
34	1	1	1	10063000	10161000	9662600	271460000	321100000	331460000	NTGIICTIGPASR	P14618	PKM	23.248	0.000117044	28.1984	0.00179729
35	1	1	1	12811000	8319800	8392100	38337000	43642000	30594000	KAAAPAPEEEMDECE	P26641	EEF1G	23.2304	0.011013	25.1613	0.00501992
36	1	1	1	11015000	10067000	7595500	17143400	21133400	24575000	SQNKEDYAGLK	P78417	GSTO1	23.1885	0.00558945	24.3205	0.00517095
37	1	1	1	6848000	7543700	10811000	9475500	11686000	12247000	ISGGSVVEMQGDEMTR	O75874	IDH1	23.0021	0.0102497	23.4087	0.00286074
38	1	1	1	9349900	6580700	1920700	5366700	2638700	2138700	EEIIPLGNQE	P55884	EIF3B	22.5046	0.0555174	21.6892	0.0389326
39	1	1	1	5072400	4497300	7549000	20390000	20409000	20131000	SGGQSEEEASINLNAINK	P04075	ALDOA	22.4441	0.0129393	24.2757	9.74567e-06
40	1	1	1	3977400	5521800	6897400	12010000	13098000	11298000	GEDLGADYNLSQVCDGK	P49327	FASN	22.3819	0.0114971	23.5327	0.000927453
41	1	1	1	4167100	4845300	3598100	22948000	19222000	11826230	LGIPEQEYSCVVK	P12004	PCNA	22.0032	0.00363738	24.1014	0.0157137
42	1	1	1	3639500	4147400	3223300	29957000	21969600	21060000	LQFHDVAGDIFHQQCK	P11413	G6PD	21.8074	0.00262946	24.5362	0.00661417
43	1	1	1	2878700	4410600	3357800	8936700	7401600	9421300	VLEDSDLKKSDIDEIVLVGGSTR	P11021	HSPA5	21.759	0.00793305	23.0336	0.00249439
44	1	1	1	1034700	2871300	2728000	71270000	59634000	69214000	LSGGQSEEEASINLNAINK	P04075	ALDOA	21.0765	0.0321708	25.9913	0.00143832
45	3115500	3026000	3118300	1	1	1	1	1	1	KMKDTDSEEEIREAF	P0DP25	CALM1	-21.5576	4.82104e-05	-21.5576	4.82104e-05
46	5483600	3174000	3341500	1	1	1	1	1	1	IFDDVIEHCSPASFK	O00410	IPO5	-21.9315	0.0164315	-21.9315	0.0164315
47	6228000	1880000	4835300	1	1	1	1	1	1	MKDTDSEEEIREAF	P0DP25	CALM1	-22.0407	0.0390398	-22.0407	0.0390398
48	2947500	5558300	5003500	1	1	1	1	1	1	VELLPDTQTPSWLGLPNNAER	Q14204	DYNC1H1	-22.1025	0.0148598	-22.1025	0.0148598
49	5262900	8423900	7938200	1	1	1	1	1	1	ESAAPAAGEEPSKEEGEPK	P80723	BASP1	-22.7812	0.00904267	-22.7812	0.00904267
50	5178400	8427500	10615000	1	1	1	1	1	1	QFQESDDADEDYGR	Q9H1E3	NUCKS1	-22.9448	0.0181007	-22.9448	0.0181007
51	7261700	13774000	14217000	1	1	1	1	1	1	VDHQTGPIVWGEPGTNGQHA	P06744	GPI	-23.4863	0.0173553	-23.4863	0.0173553
52	13552000	11573000	11919000	1	1	1	1	1	1	LDVPVPVAR	O00429	DNM1L	-23.5578	0.00121668	-23.5578	0.00121668
53	18682000	32663000	27313000	1	1	1	1	1	1	LVGPFAPGITEK	O60664	PLIN3	-24.6441	0.011645	-24.6441	0.011645
54	32467000	29267000	26424000	1	1	1	1	1	1	DTILPPTRPTDKPLR	Q05639	EEF1A2	-24.8086	0.0017548	-24.8086	0.0017548
55	32162000	46882000	26784000	1	1	1	1	1	1	QDATAEEEEDFGEEAEEEA	P07437	TUBB	-25.0722	0.0138974	-25.0722	0.0138974
56	40958000	37385000	67306000	1	1	1	1	1	1	NKDQEVNFQEY	P06703	S100A6	-25.533	0.0178758	-25.533	0.0178758
57	77147000	118210000	92469000	1	1	1	1	1	1	VSSSLPDICYR	P62633	CNBP	-26.5157	0.00761866	-26.5157	0.00761866
58	912220000	879120000	863750000	1	1	1	1	1	1	SIGHTPADAR	P15559	NQO1	-29.7212	0.000130497	-29.7212	0.000130497
The red marks indicate the interacting proteins that have already been reported, while the purple marks represent the proteins studied in this article

## Sheet: Extended Data table. 5  
Candidate Proteins for F1P interaction identified from TargetHunter based on chemogenomic database
F1P			beta-D-fructopyranose 1-phosphate C1[C@H]([C@H]([C@@H]([C@](O1)(COP(=O)(O)O)O)O)O)O	https://pubchem.ncbi.nlm.nih.gov/compound/9547924
No.	Score	Compound	Taget	Bioactivity Type	Value
1	0.99	CHEMBL1159525	Acrosin Search QuartataWeb Find Assays Nearby	Inhibition	0.1
2	0.99	CHEMBL402001	Insulin-like growth factor II receptor Search QuartataWeb Find Assays Nearby	IC50	=11.5uM
3	0.99		Cation-dependent mannose-6-phosphate receptor Search QuartataWeb Find Assays Nearby	IC50	=2.310'-5M
4	0.99	CHEMBL257975	Insulin-like growth factor II receptor Search QuartataWeb Find Assays Nearby	IC50	>10.uM
5	0.99		Solute carrier organic anion transporter family member 2A1 Search QuartataWeb Find Assays Nearby	Ki	=31000.uM
6	0.97	CHEMBL606030	Unchecked	IC50	>50.uM
7	0.93	CHEMBL43797	Unchecked	Ki	=27.7uM
8	0.93	CHEMBL75583	Mannose-6-phosphate isomerase Search QuartataWeb Find Assays Nearby	IC50	=100.uM
9	0.92	CHEMBL2030678	Inositol 1,4,5-trisphosphate receptor type 1 Search QuartataWeb Find Assays Nearby	EC50	=25190.nM
10	0.9	CHEMBL481560	Unchecked	Km	=0.6uM
11	0.9	CHEMBL604196	ADMET	Binding energy	=5.7kCal mol-1
12	0.9	CHEMBL97893	ADMET	Binding energy	=10.2kCal mol-1
13	0.9	CHEMBL1089962	Pyruvate kinase isozymes M1/M2 Search QuartataWeb Find Assays Nearby	Km	=0.1mM
14	0.84	CHEMBL2017787	Fructose-bisphosphate aldoloase, glycosomal Search QuartataWeb Find Assays Nearby	IC50	=51.uM
15	0.82	CHEMBL67622	Human immunodeficiency virus type 1 integrase Search QuartataWeb Find Assays Nearby	Inhibition	<50.%
16	0.82	CHEMBL291890	Cytochrome P450 2C9 Search QuartataWeb Find Assays Nearby	AC50	inactive
reference: Wang L, Ma C, Wipf P, Liu H, Su W, Xie XQ. TargetHunter: an in silico target identification tool for predicting therapeutic potential of small organic molecules based on chemogenomic database. AAPS J. 2013 Apr;15(2):395-406. doi: 10.1208/s12248-012-9449-z. Epub 2013 Jan 5. PMID: 23292636; PMCID: PMC3675739.

## Sheet: Extended Data table. 6 
Clinical information from 8 paired HCC tumor tissues and adjacent normal tissues were used for Western blot analysis (Extended Data Fig. 9) and metabolite detection (Fig.4)
Patient ID	Gender (M= 1, F = 0)	Age	Hepatitis B Surface Antigen	Hepatitis B e Antigen	Hepatitis B Core Antibody	Degree of Liver Cirrhosis	AFP(ug/L)	ALT(U/L)	AST(U/L)	TB(umol/L)	ALB(g/L)	PT(S)	Surgical Date	Number of Tumors	Largest Tumor Diameter (cm)	Portal Vein Tumor Thrombus	Microvascular Invasion/Micrometastases	Histological Grade	Recurrence Status	Mortality Status	Date of Death
1	1	62	＋/6187	－/0.249	＋/0.01	Small Nodular Type	>1210	33	39	13.1	37.8	14.5	2017-12-20	1	6×5×7	0	M0	III	1	1	2018-10-01
2	0	59	＋/5185	＋/2.19	＋/0.011	Mixed Nodular Type	>1210	19	30	11.5	37.7	11.5	2018-01-18	1	3.5×3	0	M0	III	0	0
3	0	26	＋/7437	－/0.114	＋/0.01	0	>1210	7	27	11.8	44.5	12	2018-03-28	2	12.5*12.3	0	M1	III	1	0
4	1	62	＋/482	－/0.087	＋/0.008	0	9.9	32	27	18	39.3	11.4	2018-04-13	1	5.5×4	0	M0	III	0	0
5	1	47	＋/8065	＋/33.63	＋/0.009	Mixed Nodular Type	31.3	53	41	15.1	35.4	12.3	2018-04-20	1	10×6	1	M2	III-IV	1	1	2019-09-01
6	1	44	＋/7074	－/0.857	＋/0.009	Mixed Nodular Type	14.5	90	95	13.6	39.7	11.2	2018-04-27	1	7×5	1	M2	III	0	1	2018-05-07
7	1	50	＋/5969	＋/6.54	＋/0.009	0	>1210	32	27	8.7	44.4	12	2018-05-02	1	3.5×3	0	M0	III	0	0
8	1	41	＋/3066	＋/78.32	＋/0.009	0	>1210	56	46	8.6	43.8	11.8	2018-05-08	1	8×5	0	M0	III	1	1	2018-11-01
9	1	50	＋/6849	＋/13.7	＋/0.009	0	2.7	42	37	10	35.1	12	2018-05-18	1	5×3.5×2.5	0	M1	III	1	0
10	1	49	＋/1118	－/0.233	＋/0.009	0	24.9	37	20	8	45.9	10.9	2018-05-18	1	1.1	0	M0	III	0	0
11	1	67	＋/6790	＋/5.23	＋/0.009	Mixed Nodular Type	83.2	24	24	9.9	36.5	11.6	2018-05-30	1	4.5×4	0	M2	III	1	1	2018-12-11
12	0	42	＋/6952	＋/1.64	＋/0.007	Large Nodular Type	2.5	12	16	6.2	35.9	12.2	2019-04-18	1	4×3.2	0	M1	III	1	1	2020-04-01
13	1	54	＋/6374	－/0.117	＋/0.01	Mixed Nodular Type	8.4	52	44	16.7	38.9	12.8	2018-06-15	1	1.8	0	M0	III	0	0
14	1	69	－/0.4	－/0.102	－/1.01	0	>1210	58	127	16.8	43	10.6	2018-06-22	1	11.8×12.6	0	M1	III	0	0
15	1	54	＋/6675	－/0.963	＋/0.01	Early-stage Cirrhosis	>1210	27	20	13.5	48.1	10.9	2018-06-27	1	3.6×3.5	0	M0	III	0	0
16	1	62	－/0.49	－/0.096	＋/0.009	0	5.3	26	23	11.5	47.9	10.4	2018-08-01	1	6×4	0	0	II	0	0
17	1	55	＋/6087	－/0.512	＋/0.009	Small Nodular Type	1.4	21	17	7.7	45.9	11	2018-08-17	1	0.9	0	M1	III	0	0
18	0	54	＋/6514	＋/2.25	＋/0.006	Large Nodular Type	>1210	18	45	18.1	46.2	11.2	2018-08-24	1	4.5×3.5	0	M0	III	1	0
19	1	47	＋/6785	－/0.981	＋/0.007	Mixed Nodular Type	>1210	50	43	11.5	42.1	11.9	2019-04-23	1	6.3×5	0	M1	III	1	0
20	1	49	＋/462.5	＋/80.19	＋/0.007	Small Nodular Type	>1210	33	72	11.7	48.7	12.1	2018-08-31	1	16×13×10	0	M1	III	0	0
21	1	48	＋/6919	－/0.357	＋/0.007	Mixed Nodular Type	307.4	41	31	13.8	42.2	12.1	2019-04-29	2	4×3.6	0	M0	III	0	0
22	1	36	＋/5564	－/0.128	＋/0.007	Small Nodular Type	456.4	38	24	8.4	49.6	10.8	2019-04-29	1	3.7×2.9	0	M1	III	0	0
23	1	62	－/0.42	－/0.107	＋/0.007	Small Nodular Type	82	60	40	21	45	11.7	2019-05-08	1	3.2×2.6×2.4	0	M1	III	0
24	1	60	－/0.58	－/0.115	+/0.007	Mixed Nodular Type	2084	12	16	9.6	37.1	12.3	2019-05-17	1	2.1×1.6	0	M0	III	0	0
25	1	52	＋/5031	＋/8.31	+/0.007	0	265101	43	57	17.6	69.1	12.7	2019-05-22	多	21.5×17.2×10.5	0	M2	III	1	0
26	0	63	＋/6554	＋/1.53	+/0.007	Post-hepatitic Cirrhosis	9.5	26	55	11.5	39.2	10.8	2019-05-22	1	11.5×8.2×6.3	0	M0	III	0	0
27	1	60	＋/2901	－/0.117	＋/0.007	0	>1210	64	88	14.3	41.3	11.1	2018-10-15	1	13×9.5	0	M2	III	0	0
28	1	46	＋/6114	－/0.125	+/0.007	Post-hepatitic Cirrhosis	8.9	56	38	17.4	64.7	12.1	2019-05-22	1	5.5×4.3	0	M0	III	0	0
29	0	51	＋/8055	－/0.093	＋/0.007	0	>1210	13	17	15.6	41.2	11	2018-11-05	1	10×7	0	M1	III	0	0
30	1	48	＋/5301	－/0.093	＋/0.007	Mixed Nodular Type	493.6	46	43	13.8	41.5	11.9	2018-10-29	1	3×2.2	0	M1	III	1	0
31	1	60	＋/4046	＋/124	+/0.007	0	24.8	63	50	9	38.6	12.6	2019-06-03	1	7.9×5.8×5.2	0	M0	III	0	0
32	1	66	－/0.54	－/0.112	－/2.31	0	5.6	71	41	11.4	43.6	10.4	2018-11-20	1	4×2.5	0	M1	III	0	1
33	0	57	＋/5743	－/0.634	+/0.007	Small Nodular Type	1813	13	16	6.6	36.8	13.1	2019-06-05	2	5.3×3.8×3.5	0	M1	III	1	1	2020-06-01
34	1	43	＋/7580	＋/15.09	＋/0.008	0	8	69	104	17.8	41.4	11.4	2018-12-17	1	14×10	0	M1	III	0	0
35	0	50	－/0.44	－/0.088	－/2	0	15.8	60	59	3.7	37.9	11.2	2018-12-24	1	9.5×9	0	M0	II	0	0
36	1	56	－/0.74	－/0.114	＋/0.008	0	1.7	10	13	6.3	43.8	10.8	2018-12-28	1	2.3×1.5	0	M1	II-III	0	0
37	1	61	＋/8.28	－/0.11	＋/0.007	0	5.9	29	21	21.6	40.9	10.8	2018-12-27	1	2.5×2	0	0	III	0	0
38	0	56	＋/5217	＋/19.43	＋/0.008	Mixed Nodular Type	>1210	32	62	14.7	39.2	11.9	2019-01-07	1	13.2×4.4	0	M2	III	1	1	2020-08-01
39	1	42	＋/4495	＋/6.31	＋/0.007	Mixed Nodular Type	6.1	58	35	10	42.2	11.8	2019-01-08	1	4.5×2.6	0	M1	III	1	0
40	1	55	＋/7876	－/0.111	＋/0.008	0	1044	14	15	8.1	38.7	10.6	2019-01-09	1	4×3	0	M0	III	0	0
41	1	48	＋/7483	－/0.15	＋/0.008	0	>1210	58	74	21	43	12.7	2019-01-21	1	11.5×7.2	0	M0	III	0	1
42	1	44	＋/7594	＋/2.88	＋/0.007	Mixed Nodular Type	24.4	29	22	8.3	44.8	10.8	2019-02-14	2	3×2.6	0	M0	III	0	0
